# Supplementary material
Source: PubMed Central journal article supplement (PMC6476101)
Supplement: jgme-11-02-06_s01.pdf [file jgme-11-02-06_s01.pdf]

# OFFICIAL CORD STANDARDIZED LETTER OF EVALUATION (SLOE)

2016-2017 APPLICATION SEASON  
Emergency Medicine Faculty ONLY

Jackson JS, Bond M, Love JN, Hegarty C.  
Emergency Medicine Standardized Letter of  
Evaluation (SLOE): Findings From the New  
Electronic SLOE Format. *J Grad Med Educ.*  
2019;11(2):182-186.

I have read this year's instructions @ [www.cordem.org](http://www.cordem.org)  Yes  No

|                              |                                                                           |                   |                                                  |
|------------------------------|---------------------------------------------------------------------------|-------------------|--------------------------------------------------|
| Applicant's Name:            | <input type="text" value="Test Student"/>                                 | AAMC ERAS ID No.  | <input type="text" value="92398203203232"/>      |
| Letter Writers' Institution: | <input type="text" value="University of Maryland - University Hospital"/> | Email:            | <input type="text" value="faculty@nowhere.com"/> |
| Reference Provided By:       | <input type="text" value="Faculty Member"/>                               | Telephone:        | <input type="text" value="410-555-1212"/>        |
|                              |                                                                           | Present Position: | <input type="text" value="Chair"/>               |

## A. Background Information

1. How long have you known the applicant?

2. Nature of contact with applicant: (Check all that apply)

Know indirectly through others/evaluations  Extended, direct observation in the ED

Clinical contact outside the ED  Advisor

Occasional contact (<10 hours) in the ED

Other:

3. a. Did this candidate rotate in your ED?  Yes  No

b. If so, what grade was given?

Honors  High Pass  Pass  Low Pass  Fail

4. Is this the student's first, second or third EM rotation?

What date(s) did this student rotate at your institution? (mm/yy)

5. Indicate what % of students rotating in your Emergency Department received the following grades last academic year:

Honors %

High Pass %

Pass %

Low Pass %

Fail %

100 % Total

Total # students last year:

EM is a required rotation for all students at our institution?  Yes  No

**B. Qualifications for EM. Compare the applicant to other EM applicants/peers.**

1. Commitment to Emergency Medicine. Has carefully thought out this career choice.  
 Above Peers (Top 1/3)       At level of peers (Middle 1/3)       Below peers (Lower 1/3)
2. Work ethic, willingness to assume responsibility.  
 Above Peers (Top 1/3)       At level of peers (Middle 1/3)       Below peers (Lower 1/3)
3. Ability to develop and justify an appropriate differential and a cohesive treatment plan.  
 Above Peers (Top 1/3)       At level of peers (Middle 1/3)       Below peers (Lower 1/3)
4. Ability to work with a team.  
 Above Peers (Top 1/3)       At level of peers (Middle 1/3)       Below peers (Lower 1/3)
5. Ability to communicate a caring nature to patients.  
 Above Peers (Top 1/3)       At level of peers (Middle 1/3)       Below peers (Lower 1/3)
6. How much guidance do you predict this applicant will need during residency?  
 Less than peers       The same as peers       More than peers
7. Given the necessary guidance, what is your prediction of success for the applicant?  
 Outstanding       Excellent       Good

**C. Global Assessment**

1. Compared to other EM residency candidates you have recommended in the last academic year, this candidate is in the:

| <u>Ranking</u>                           | # Recommended in each category last academic year |
|------------------------------------------|---------------------------------------------------|
| <input checked="" type="radio"/> Top 10% | <input type="text" value="10"/>                   |
| <input type="radio"/> Top 1/3            | <input type="text" value="10"/>                   |
| <input type="radio"/> Middle 1/3         | <input type="text" value="10"/>                   |
| <input type="radio"/> Lower 1/3          | <input type="text" value="10"/>                   |

Total Number of letters you wrote last year:

2. a. Are you currently on the committee that determines the final rank list?       Yes       No
- b. How highly would you estimate the candidate will reside on your rank list? (see instructions if questions)  
 Top 10%  
 Top 1/3  
 Middle 1/3  
 Lower 1/3  
 Unlikely to be on our rank list

**D. Written Comments:**

Please concisely summarize this applicant's candidacy including... (1) Areas that will require attention, (2) Any low rankings from the SLOE, and (3) **Any relevant noncognitive attributes such as leadership, compassion, positive attitude, professionalism, maturity, self-motivation, likelihood to go above and beyond, altruism, recognition of limits, conscientiousness, etc.** (please limit your response to 250 words or less)

An example

Please concisely summarize any pieces of information regarding your institution/rotation that you deem important or necessary. (please limit your response to 250 words or less)

An example

STUDENT HAS WAIVED RIGHT TO SEE THIS LETTER  Yes  No

Date:

Signature:

\*Once form is signed it cannot be edited. To save an editable version of the form please save this form before signing.

eSLOE User Dashboard

Welcome to CORD  
eSLOE!

A secure and modern way to store your evaluations.

Login

[Forgot your password?](#)

CORD e

- Dashboard
- Evaluations
- Users

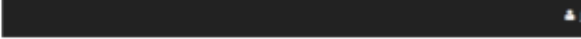

Dashboard -

33  
Lifetime Evaluations  
[View Details](#)

Update SLOE Template Settings  
[Update Settings](#)

Let Us Know What You Think  
[Send Feedback](#)

Show Stats For All Evaluations from Your Institution

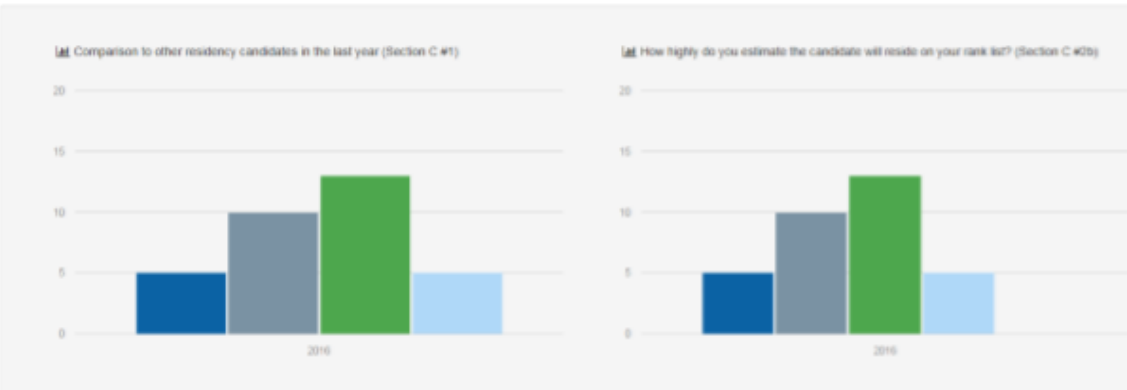

**Supplement 3 - Statistical Analysis of "Global Assessment "**

**Question 1 - Compared to other EM residency candidates you have recommended in the last academic year, this candidate is in the:**

**Chi-Square Test - Question 1**

|            | Observed N | Expected N | Residual |
|------------|------------|------------|----------|
| Lower 1/3  | 684        | 2237       | -1553    |
| Middle 1/3 | 2318       | 2237       | 81       |
| Top 1/3    | 2482       | 1565.3     | 916.7    |
| Top 10%    | 1227       | 671.7      | 555.3    |
| Total      | 6711       |            |          |

**Test Statistics**

| Question 1  |                       |
|-------------|-----------------------|
| Chi-Square  | 2077.004 <sup>a</sup> |
| df          | 3                     |
| Asymp. Sig. | 0                     |

a. 0 cells (0.0%) have expected frequencies less than 5. The minimum expected cell frequency is 671.7.

**Question 2b - How highly would you estimate the candidate will reside on your rank list?**

**Chi-Square Test - Question 2b**

|            | Observed N | Expected N | Residual |
|------------|------------|------------|----------|
| Lower 1/3  | 817        | 2202.7     | -1385.7  |
| Middle 1/3 | 2174       | 2202.7     | -28.7    |
| Top 1/3    | 2433       | 1541.3     | 891.7    |
| Top 10%    | 1184       | 661.4      | 522.6    |
| Total      | 6608       |            |          |

**Test Statistics**

| Question 2B |                       |
|-------------|-----------------------|
| Chi-Square  | 1800.943 <sup>a</sup> |
| df          | 3                     |
| Asymp. Sig. | 0                     |

a. 0 cells (0.0%) have expected frequencies less than 5. The minimum expected cell frequency is 661.4.

**Spearman Correlation - "Global Assessment" Question 1 and 2b**

|                       |             | Question 1              | Question 2b        |
|-----------------------|-------------|-------------------------|--------------------|
| <b>Spearman's rho</b> | Question 1  | Correlation Coefficient | 1                  |
|                       |             | Sig. (2-tailed)         | 0                  |
|                       | Question 2b | N                       | 6605               |
|                       |             | Correlation Coefficient | .891 <sup>**</sup> |
|                       |             | Sig. (2-tailed)         | 0                  |
|                       |             | N                       | 6605               |

\*\* . Correlation is significant at the 0.01 level (2-tailed).

Supplement 4

| <u>Clerkship Grade and "Global Assessment " (Overall Combinations)</u> |                   |               |                  |             |                 |             |                      |
|------------------------------------------------------------------------|-------------------|---------------|------------------|-------------|-----------------|-------------|----------------------|
|                                                                        | <u>Grade</u>      | <u>Honors</u> | <u>High Pass</u> | <u>Pass</u> | <u>Low Pass</u> | <u>Fail</u> | <u>None Selected</u> |
|                                                                        | <u>Top 10</u>     | 15.1%         | 1.2%             | 1.8%        | 0.0%            | 0.0%        | 0.1%                 |
| <b>Global</b>                                                          | <u>Top 1/3</u>    | 18.7%         | 12.7%            | 5.4%        | 0.0%            | 0.0%        | 0.1%                 |
| <b>Assessment -</b>                                                    | <u>Middle 1/3</u> | 5.1%          | 19.3%            | 9.9%        | 0.1%            | 0.0%        | 0.1%                 |
| <b>Question 1</b>                                                      | <u>Lower 1/3</u>  | 0.4%          | 3.4%             | 5.9%        | 0.3%            | 0.0%        | 0.1%                 |

"Global Assessment " based on Clerkship Grade

|                     | <u>Grade</u>      | <u>Honors</u> | <u>High Pass</u> | <u>Pass</u> | <u>Low Pass</u> | <u>Fail</u> |
|---------------------|-------------------|---------------|------------------|-------------|-----------------|-------------|
|                     | <u>Top 10</u>     | 38.3%         | 3.4%             | 7.9%        | 0.0%            | 0.0%        |
| <b>Global</b>       | <u>Top 1/3</u>    | 47.6%         | 34.7%            | 23.3%       | 0.0%            | 0.0%        |
| <b>Assessment -</b> | <u>Middle 1/3</u> | 13.0%         | 52.6%            | 43.0%       | 18.5%           | 0.0%        |
| <b>Question 1</b>   | <u>Lower 1/3</u>  | 1.1%          | 9.3%             | 25.5%       | 81.5%           | 100.0%      |
